# Supplementary material for: Underpinning the Development of Seaweed Biotechnology: Cryopreservation of Brown Algae (Saccharina latissima) Gametophytes
Source: PubMed Central journal article supplement (PMC6791476; doi:10.1089/bio.2018.0147), 2019-10-10
Supplement: Supp_Table1-2.pdf [file Supp_Table1-2.pdf]

# Supplementary Data

SUPPLEMENTARY TABLE S1. EFFECTS OF VARIOUS CRYOPROTECTANTS AND PRESERVATION METHODS ON THE VIABILITY OF MALE (♂) AND FEMALE (♀) GAMETOPHYTIC CELLS OF *SACCHARINA LATISSIMA* 52 DAYS POST-THAWING (MEDIAN,  $N=6$  AND  $N_{Mr. Frosty}=4$ )

| Cryoprotectant                                  | Survival                       |   |                        |   |                           |   |                           |    |            |    |          |    |
|-------------------------------------------------|--------------------------------|---|------------------------|---|---------------------------|---|---------------------------|----|------------|----|----------|----|
|                                                 | Cryoprotectant<br>(noncooling) |   | LN2<br>(direct plunge) |   | Controlled<br>rate cooler |   | Stirling cycle<br>freezer |    | Mr. Frosty |    | CoolCell |    |
|                                                 | ♂                              | ♀ | ♂                      | ♀ | ♂                         | ♀ | ♂                         | ♀  | ♂          | ♀  | ♂        | ♀  |
| 5% (v/v) DMSO                                   | Crossed*                       |   | -                      | - | Crossed*                  |   | Crossed*                  |    | Crossed*   |    | Crossed* |    |
| 10% (v/v) DMSO +9% (w/v) D-sorbitol             |                                |   | -                      | - |                           |   |                           |    |            |    |          |    |
| 10% (v/v) polyethylene glycol                   |                                |   | -                      | - |                           |   | ++                        | ++ | ++         | ++ | ++       | ++ |
| 10% (v/v) methanol                              |                                |   | -                      | - |                           |   | -                         | -  | -          | -  | -        | -  |
| 5% (v/v) polyethylene glycol +5% (v/v) methanol |                                |   | -                      | - |                           |   | Crossed*                  |    |            |    |          |    |

- - - = no viability.  
 - + = 0-20% viability.  
 - ++ = 20-50% viability.  
 - +++ = 50-80% viability.  
 - ++++ = >80% viability.

\*Crossed, start induction of gametogenesis and fertilization 35 days post-thawing.

SUPPLEMENTARY TABLE S2. EFFECTS OF VARIOUS CRYOPROTECTANTS AND PRESERVATION METHODS ON THE VIABILITY OF MALE (♂) AND FEMALE (♀) GAMETOPHYTIC CELLS OF *SACCHARINA LATISSIMA* 10 DAYS POST-THAWING (MEDIAN,  $N=6$ )

| Cryoprotectant                                    | Survival                       |   |                        |   |                           |    |                           |   |            |   |          |   |
|---------------------------------------------------|--------------------------------|---|------------------------|---|---------------------------|----|---------------------------|---|------------|---|----------|---|
|                                                   | Cryoprotectant<br>(noncooling) |   | LN2<br>(direct plunge) |   | Controlled<br>rate cooler |    | Stirling cycle<br>freezer |   | Mr. Frosty |   | CoolCell |   |
|                                                   | ♂                              | ♀ | ♂                      | ♀ | ♂                         | ♀  | ♂                         | ♀ | ♂          | ♀ | ♂        | ♀ |
| 5% (v/v) DMSO                                     | +                              | + | -                      | - | ++                        | ++ | -                         | - | -          | - | -        | - |
| 10% (v/v) DMSO +9% (w/v) D-sorbitol               | +                              | + | -                      | - | ++                        | ++ | -                         | - | -          | - | -        | - |
| 10% (v/v) polyethylene glycol                     | +                              | + | -                      | - |                           |    | -                         | - | -          | - | -        | - |
| 10% (v/v) methanol                                | +                              | + | -                      | - |                           |    | -                         | - | -          | - | -        | - |
| 10% (v/v) polyethylene glycol +10% (v/v) methanol | +                              | + | -                      | - |                           |    | -                         | - | -          | - | -        | - |

- - - = no viability.  
 - + = 0-20% viability.  
 - ++ = 20-50% viability.  
 - +++ = 50-80% viability.  
 - ++++ = >80% viability.  
 DMSO, dimethyl sulfoxide.
