# Supplementary material for: Underpinning the Development of Seaweed Biotechnology: Cryopreservation of Brown Algae (Saccharina latissima) Gametophytes
Source: Biopreserv Biobank. 2019 Oct 10;17(5):378–86. doi: 10.1089/bio.2018.0147 (PMC6791476; doi:10.1089/bio.2018.0147)
Supplement: Supplemental data [file Supp_Table3-4.pdf]

SUPPLEMENTARY TABLE S3. EFFECTS OF VARIOUS CRYOPROTECTANTS AND PRESERVATION METHODS ON THE VIABILITY OF MALE (♂) AND FEMALE (♀) GAMETOPHYTIC CELLS OF *SACCHARINA LATISSIMA* 24 DAYS POST-THAWING (MEDIAN,  $N=6$  AND  $N_{\text{MR. FROSTY}}=4$ )

| <i>Cryoprotectant</i>                           | <i>Survival</i>                    |  |   |                            |   |   |                               |   |   |                               |   |   |
|-------------------------------------------------|------------------------------------|--|---|----------------------------|---|---|-------------------------------|---|---|-------------------------------|---|---|
|                                                 | <i>Cryoprotectant (noncooling)</i> |  |   | <i>LN2 (direct plunge)</i> |   |   | <i>Controlled rate cooler</i> |   |   | <i>Stirling cycle freezer</i> |   |   |
|                                                 | ♂                                  |  | ♀ | ♂                          |   | ♀ | ♂                             |   | ♀ | ♂                             |   | ♀ |
|                                                 |                                    |  |   |                            |   |   |                               |   |   |                               |   |   |
| 5% (v/v) DMSO                                   | +                                  |  | + | -                          | - | - | -                             | + | - | -                             | + | - |
| 10% (v/v) DMSO +9% (w/v) D-sorbitol             | +                                  |  | + | -                          | - | - | -                             | + | - | -                             | + | - |
| 10% (v/v) polyethylene glycol                   | +                                  |  | + | -                          | - | - | -                             | + | - | -                             | + | - |
| 10% (v/v) methanol                              | +                                  |  | + | -                          | - | - | -                             | + | - | -                             | + | - |
| 5% (v/v) polyethylene glycol +5% (v/v) methanol | +                                  |  | + | -                          | - | - | -                             | + | - | -                             | + | - |

- - - = no viability.  
 - - + = 0–20% viability.  
 - + + = 20–50% viability.  
 + + + = 50–80% viability.  
 + = >80% viability.

SUPPLEMENTARY TABLE S4. EFFECTS OF VARIOUS CRYOPROTECTANTS AND PRESERVATION METHODS ON THE VIABILITY OF MALE (♂) AND FEMALE (♀) GAMETOPHYTIC CELLS OF *SACCHARINA LATISSIMA* 35 DAYS POST-THAWING (MEDIAN,  $N=6$  AND  $N_{\text{MR. FROSTY}}=4$ )

| <i>Cryoprotectant</i>                           | <i>Survival</i>                    |  |   |                            |   |   |                               |   |   |                               |   |   |
|-------------------------------------------------|------------------------------------|--|---|----------------------------|---|---|-------------------------------|---|---|-------------------------------|---|---|
|                                                 | <i>Cryoprotectant (noncooling)</i> |  |   | <i>LN2 (direct plunge)</i> |   |   | <i>Controlled rate cooler</i> |   |   | <i>Stirling cycle freezer</i> |   |   |
|                                                 | ♂                                  |  | ♀ | ♂                          |   | ♀ | ♂                             |   | ♀ | ♂                             |   | ♀ |
|                                                 |                                    |  |   |                            |   |   |                               |   |   |                               |   |   |
| 5% (v/v) DMSO                                   | +                                  |  | + | -                          | - | - | -                             | + | - | -                             | + | - |
| 10% (v/v) DMSO +9% (w/v) D-sorbitol             | +                                  |  | + | -                          | - | - | -                             | + | - | -                             | + | - |
| 10% (v/v) polyethylene glycol                   | +                                  |  | + | -                          | - | - | -                             | + | - | -                             | + | - |
| 10% (v/v) methanol                              | +                                  |  | + | -                          | - | - | -                             | + | - | -                             | + | - |
| 5% (v/v) polyethylene glycol +5% (v/v) methanol | +                                  |  | + | -                          | - | - | -                             | + | - | -                             | + | - |

- - - = no viability.  
 - - + = 0–20% viability.  
 - + + = 20–50% viability.  
 + + + = 50–80% viability.  
 + = >80% viability.
